# Supplementary material for: An Investigation into CO2–Brine–Cement–Reservoir Rock Interactions for Wellbore Integrity in CO2 Geological Storage
Source: MDPI journal article supplement (doi:10.3390/en14165033), 2021-08-16
Supplement: s1 [file s1]

# An Investigation into CO<sub>2</sub>-Brine-Cement-Reservoir Rock Interactions for Wellbore Integrity in CO<sub>2</sub> Geological Storage

Amir Jahanbakhsh<sup>1\*</sup>, Qi Liu<sup>1,‡</sup>, Mojgan Hadi Mosleh<sup>2,§</sup>, Harshit Agrawal<sup>2</sup>, Nazia Mubeen Farooqui<sup>1</sup>, Jim Buckman<sup>3</sup>, Montserrat Recasens<sup>1,¶</sup>, M. Mercedes Maroto-Valer<sup>1</sup>, Anna Korre<sup>2</sup> and Sevket Durucan<sup>2\*</sup>

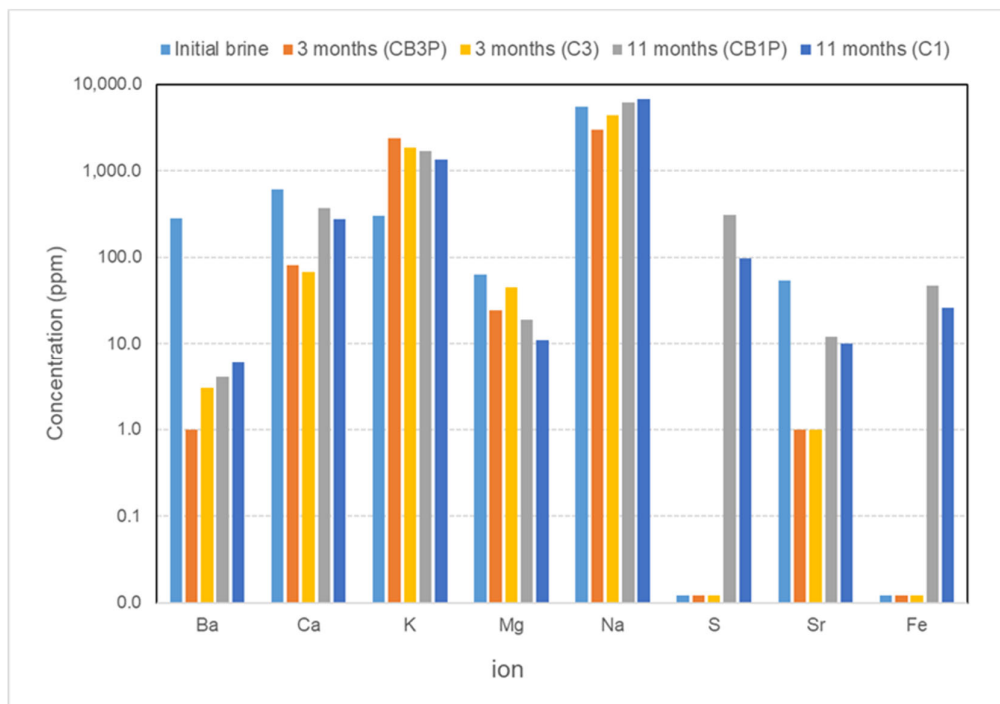

**Figure S1.** Concentration of ions present in the brine at initial conditions, after CO<sub>2</sub> injection for 3 months (for samples CB1P and C3) and 11 months (for samples CB3P and C1).

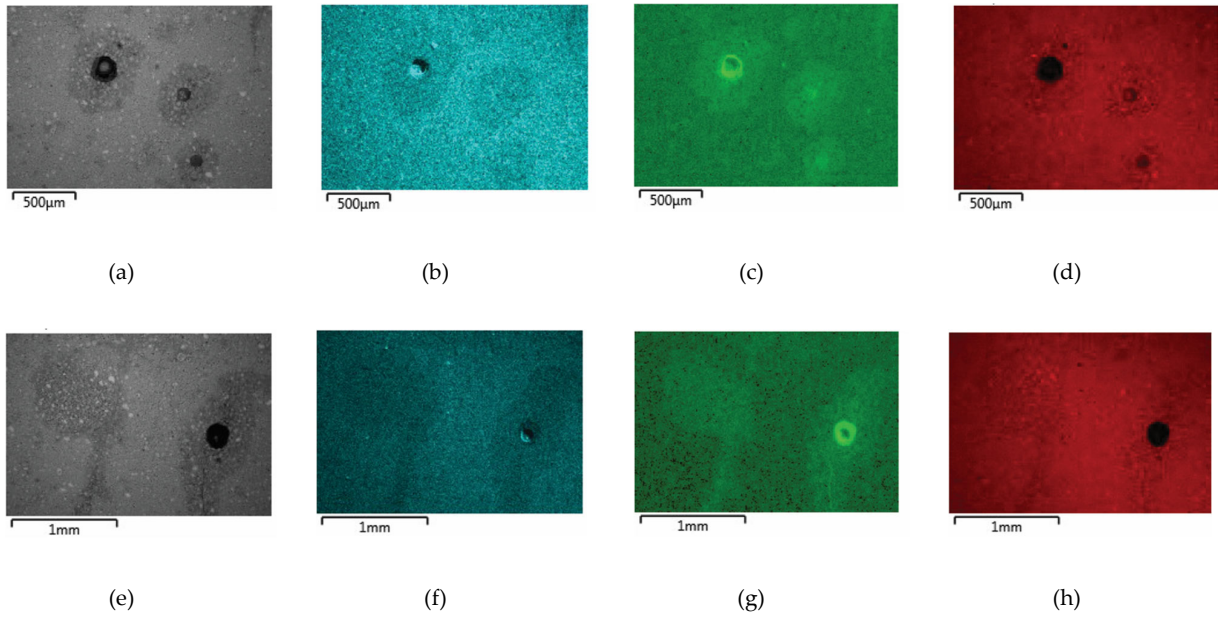

**Figure S2.** Top left corner of CB1P after exposure to CO<sub>2</sub>-rich brine for 11 months (a) and (e) BSE images, and (b) to (d) and (f) to (h) EDX elemental maps of areas in (a) and (e). (b) and (f) oxygen, (c) and (g) carbon, (d) and (h) calcium.

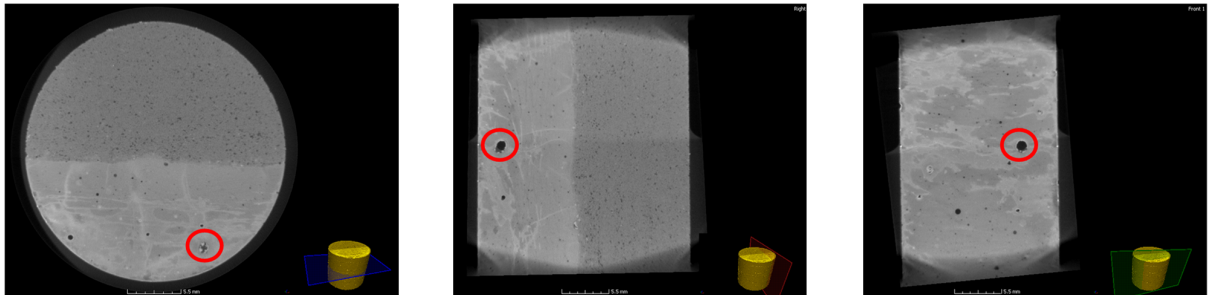

**Figure S3.** CB1P composite sample after 11 months exposure to CO<sub>2</sub>-rich brine; precipitation in the void spaces in the red circle where the access of solution was possible through several fractures.

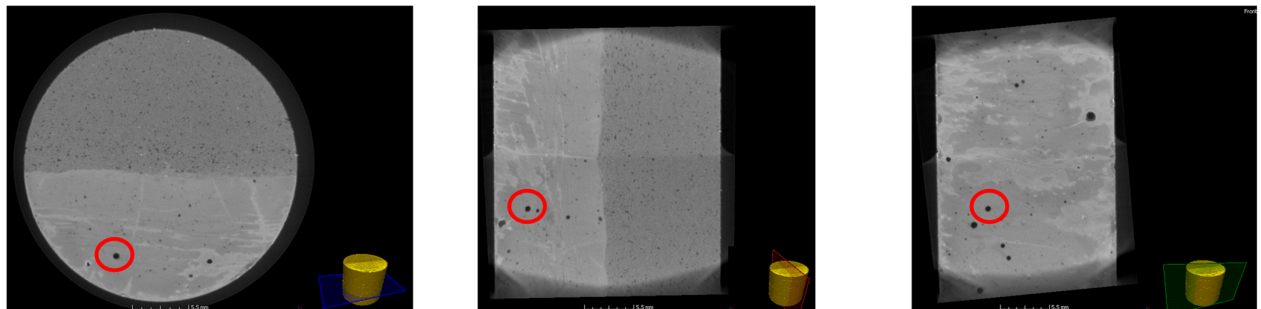

**Figure S4.** CB1P composite sample after 11 months exposure to CO<sub>2</sub>-rich brine, no significant precipitation in the voids, which are not connected to the fractures.
